# Supplementary material
Source: publisher site journal article supplement (https://www.dovepress.com/article/599766)
Supplement: Supplementary file 1 [file 599766%20Revised%20supplementary%20materials.docx]

**Effectiveness of FF/UMEC/VI versus ICS/LABA in patients with uncontrolled asthma treated in routine clinical practice (PERFORM): A pragmatic randomized controlled trial**

Erika Penz, Stephen G Noorduyn, Alison C Moore, Hiroyuki Nagase,
Jodie Crawford, Mary Woessner, Lydia Demetriou, Nicola Brown, David Slade, Gabriel Garcia, Alan P Baptist, John J Oppenheimer

**Supplementary material**

**List of primary investigators and sites**

| **Country** |
| --- |
| Primary investigator associated with trial site: surname, first name |
| **Argentina** |
| Arce, German |
| Ardusso, Dario |
| Cambursano, Victor Hugo |
| Del Olmo, Ricardo |
| Delgado Vizcarra, Rita Gisela |
| Elias, Pedro Carlos |
| Fazio, Cristian |
| Fernandez, Marcelo |
| Fernandez-Acquier, Mariano |
| Figueroa, Sandra |
| Garcia, Gabriel |
| Gattolin, Gabriel |
| Maillo, Martin |
| Malet Ruiz, Jose |
| Marcipar, Adriana |
| Medina, Andrea |
| Molina, Alicia |
| Saez Scherbovsky, Pablo |
| Sosso, Adriana |
| Stok, Ana |
| Tedesco, Hugo |
| Victorio, Carlos Fabian |
| Wehbe, Luis |
| Yanez, Anahi |
| **Australia** |
| Bremner, Peter |
| Douglas, Dominic |
| Leah, Amber |
| Leong, Esmond |
| Voloshyna, Olga |
| Wiradjaja Arya, Ktut |
| Wong, Aaron |
| **Canada** |
| Anees, Syed Muhammad Yousuf |
| Gauthier, Patrice |
| **Japan** |
| Ebe, Yusuke |
| Fujiki, Rei |
| Hamaguchi, Naohiko |
| Haruta, Yoshinori |
| Hayashi, Shinichiro |
| Hozawa, Soichiro |
| Inaba, Megumi |
| Iwai, Madoka |
| Kamei, Tadashi |
| Kanehara, Masashi |
| Kawabata, Hiroki |
| Kawarada, Yuji |
| Kihara, Norio |
| Kijima, Hirotake |
| Kinoshita, Masaharu |
| Mizoo, Akira |
| Moriyama, Yusuke |
| Nagai, Kenjiro |
| Nagase, Hiroyuki |
| Nishiyama, Yuki |
| Ohbayashi, Hiroyuki |
| Osaki, Shinichi |
| Sakagami, Takuro |
| Sasamoto, Akiyoshi |
| Shibasaki, Atsushi |
| Shinada, Jun |
| Tanaka, Akihiko |
| Tobino, Kazunori |
| Yamagata, Eiji |
| Yatera, Kazuhiro |
| Yokoyama, Takahiro |
| **South Korea** |
| Chang, Yoon-seok |
| Kang, Hye Ryun |
| Kim, Byung-keun |
| Kim, Hee Kyoo |
| Kim, Min-hye |
| Kim, Sang-heon |
| Park, Han-ki |
| Yang, Min-suk |
| Ye, Young-min |
| Yoo, Kwang-ha |
| **Taiwan** |
| Chen, Chia-hung |
| Chien, Jung-yien |
| Fu, Pin-kuei |
| Sheu, Chau-chyun |
| **United States** |
| Averill, Francis |
| Bansal, Sandeep |
| Baptist, Alan |
| Baxter, Barbara |
| Bernstein, David |
| Castillo, Luis |
| Cypcar, David |
| Decotiis, Bruce |
| Denenberg, Michael |
| Dunn, Bryan |
| Elkayam, David |
| Eziri, Emeka |
| Hernandez, Humberto |
| Heuer, Marvin |
| Klein, Ryan |
| Landman, Jaime |
| Makam, Sashi |
| McGill, Lorrie |
| Mintz, Matthew |
| Moore, Wendy |
| Palumbo, Michael |
| Panettieri, Reynold |
| Parodi, Franco |
| Perez, Guido |
| Petteway, Anita |
| Posey, Andrew |
| Ravid, Joseph |
| Rodicio, Ileana |
| Saff, Ronald |
| Shapero, Paul |
| Sharif, Roozbeh |
| Shenoy, Kartik |
| Siddiqui, Farhan |
| Silvey, Allen |
| Siri, Dareen |
| Sitz, Karl |
| Thornblade, Carl |
| Waits, John |

**Methods**

***Trial design***

After screening (Visit 1), patients underwent randomization (Visit 2), either the following day or up to 7 days thereafter. Patients continued to receive current asthma maintenance medication (if receiving any) until randomization. Where it was usual practice for patients to withhold inhaler medications prior to the clinic visit, Visit 1 and 2 could be combined and completed on the same day.

Randomization was performed using a central-based interactive voice/web response system. The randomization sequence was generated using a validated computerized system. As this was an open-label trial, site-level blinding procedures were not in place; however, data review and preparations for the statistical analysis were conducted using blinded data to ensure the integrity of the data and analysis plan.

Patients were randomized 1:1 to initiate once-daily single-inhaler fluticasone furoate/umeclidinium/vilanterol (FF/UMEC/VI); delivered via ELLIPTA dry-powder inhaler) or initiate or continue non-ELLIPTA inhaled corticosteroid/long-acting β2-agonist (ICS/LABA). Patients received trial interventions in accordance with country-specific regulatory labels and usual clinical practice. Non-ELLIPTA ICS/LABA usual care was defined as initiating or continuing the investigator’s choice of non-ELLIPTA ICS/LABA for 52 weeks, in line with country-specific regulatory labels and at the investigator’s discretion. Trial interventions were prescribed per usual clinical practice; medications were sourced from local commercial supplies. No additional measures outside of usual care were taken to monitor treatment compliance.

Treatment randomization was stratified by pre-trial asthma maintenance therapy (untreated, ICS alone, ICS/LABA) and pre-trial ICS dose (high, low). ICS dose tapering was not required for patients who were previously treated with ICS-containing maintenance therapy. As such, patients in each treatment arm treated with a high-dose ICS-containing medication at baseline could be initiated on high-dose FF/UMEC/VI 200/62.5/25 µg or high-dose equivalent non-ELLIPTA ICS/LABA, in compliance with local guidelines and at the investigator’s discretion. ICS dose escalation was permissible post randomization in patients prescribed FF/UMEC/VI 100/62.5/25 µg or low-dose ICS/LABA, provided they demonstrated significant worsening of control (ie, change in Asthma Control Questionnaire [ACQ]-7 score [increase] >0.5) and if deemed necessary by the treating physician; in such cases, patients could be escalated to FF/UMEC/VI 200/62.5/25 µg or high-dose ICS/LABA, respectively. Trial intervention crossover was not permitted.

Patients could withdraw from the trial at any time and for any reason at their own request or could be withdrawn for safety reasons at the investigator’s discretion. Investigators attempted to contact patients who did not return for scheduled visits or follow-up. Reasons for patient withdrawal were documented in the patient’s electronic case report form (eCRF).

Patients discontinuing trial intervention prior to the Week 52 visit (Visit 4) had the safety follow-up 7 days after discontinuation. Patients who discontinued trial intervention could continue to comply with the schedule of assessments in the trial protocol at the investigator’s discretion, with data recorded as “post treatment.” Any data collected at Week 24 following discontinuation were included in the primary analysis, with the intercurrent event of trial intervention discontinuation handled using a treatment policy approach, including on-treatment and post-treatment data.

Patients were considered lost to follow-up and to have withdrawn from the trial if they repeatedly failed to return for scheduled trial visits and were unable to be contacted by the trial site. The trial site attempted to contact these patients to reschedule the visit and determine if they wished to continue in the trial; contact attempts were documented in the patient’s medical records.

***Concomitant medications***

All asthma medications taken during the 3-month pre-randomization period and during the trial period (including safety follow-up) were recorded in the patient eCRF. Patients randomized to ICS/LABA could initiate or continue maintenance and reliever therapy (MART) at the investigator’s discretion, provided MART was approved according to local regulatory labels. Long-acting muscarinic antagonist-containing medications were not permitted in the 12 months prior to the trial.

Patients could continue to use rescue medication taken prior to the start of the trial; rescue medication use in the 12 months prior to the trial and during the trial was recorded in the eCRF. Short-acting muscarinic antagonist-containing medications were not permitted as rescue therapy during the trial period. Asthma exacerbations were treated in line with national and international guidelines and per local routine practice; the temporary use of asthma medications to treat asthma exacerbations was recorded in the eCRF.

All non-asthma medications taken during the trial period (including safety follow-up) and any changes to concomitant medications were also recorded in the eCRF. Non-asthma medications permitted with caution included systemic and ophthalmic
β-blockers, tricyclic antidepressants, monoamine oxidase inhibitors, diuretics, and cytochrome p450 3A4 inhibitors.

***Effectiveness outcome assessment***

*Pulmonary function testing*

Spirometry was performed during trial visits to assess forced expiratory volume in
1 second (FEV1) and forced vital capacity; ≥2 acceptable spirometry maneuvers (from a maximum of 8 attempts) were required, in line with American Thoracic Society/European Respiratory Society guidance1. At randomization, patients had to perform ≥2 acceptable and 1 repeatable maneuver to be eligible for inclusion. From randomization through to the end of trial (including early withdrawal if applicable), where possible, patients withheld short-acting β2-agonist medication for ≥6 hours and LABA medication for ≥24 hours prior to the trial visit. Patients unable to withhold medication were asked to return to the clinical site within 7 days of the original visit date to perform spirometry maneuvers*.* Patients unable to achieve ≥2 acceptable and 1 repeatable maneuver at Visits 3 and 4 were permitted, at the investigator’s discretion, to attend the clinic again to perform FEV1 maneuvers, provided this took place within 7 days of the scheduled visit. Where possible, spirometry assessments were performed at approximately the same time of day as the assessment performed at randomization (baseline assessment).

*Patient-reported outcomes*

All patient-reported outcomes (PROs) were self-administered and completed using an electronic PRO device during trial visits, and where possible, were administered at the same time of day during each visit.

*Asthma Control Questionnaire*

The ACQ-7 comprises 5 symptom-related questions (nocturnal awakening, symptoms on waking in the morning, activity limitation, shortness of breath, and wheeze; responses are scored on a Likert scale from 0 [no impairment] to 6 [maximum impairment]), a question on rescue medication use and a lung function item based on FEV12. The recall period is the prior 7 days. A score of ≤0.75 indicates well-controlled asthma and a score ≥1.5 indicates not well-controlled asthma3. A 0.5-point change in score suggests a clinically important change in asthma control. Two shorter versions of the ACQ are derived from the ACQ-7: the ACQ‑5, including only the symptom control items, and the ACQ-6, including symptom control and rescue medication use items4.

*Asthma Control Test*

The Asthma Control Test (ACT) is a 5-item questionnaire that assesses symptoms, rescue medication use and the effect of asthma on daily functioning5,6. The recall period is the previous 4 weeks. Questions are scored using a 5-point Likert scale; scores are summed ranging from 5 to 25, with higher scores indicating better asthma control5,6. Scores ≥20 indicate well-controlled asthma; scores ≤15 indicate poorly controlled asthma; scores of 16–19 indicate somewhat controlled asthma6.

***Safety reporting***

Treatment-emergent trial intervention/treatment-related adverse events (AEs) and all serious adverse events (SAEs), as well as other safety information, were recorded by the investigator and other qualified designees. A treatment-emergent AE was defined as any untoward medical occurrence (eg, unfavorable or unintended sign [including an abnormal laboratory finding], symptom, or disease [new or exacerbated]) with onset dates on or after the start of the trial intervention and up to 7 days after the last dose of trial intervention, as determined by the investigator. An SAE was defined as any untoward medical occurrence meeting one or more of the following criteria: resulted in death; was life threatening at the time of the event; required inpatient hospitalization or prolonged an existing hospitalization; resulted in persistent or significant disability/incapacity; was a congenital anomaly/birth defect in the offspring of a trial patient; was an abnormal pregnancy outcome; suspected transmission of any infectious agent via an authorized medicinal product; possible Hy’s law case; or other significant medical event deemed an SAE by the investigator.

All AEs related to trial participation (eg, trial intervention/treatment, protocol-mandated procedures, invasive tests, or a change in existing therapy) were recorded from randomization until trial completion. SAEs assessed as related to trial participation were collected from the time of patient consent to participate in the trial until the end of the trial. Unrelated SAEs were collected from the start of trial intervention until the end of the trial. All relevant SAEs were reported to the trial sponsor within 24 hours. Following a trial intervention/treatment-related AE or SAE, investigators followed-up with the patient at each subsequent trial visit. All SAEs were followed until resolution, stabilization, the event was otherwise explained, or the patient was lost to follow-up. Cardiovascular events (myocardial infarction/unstable angina, congestive heart failure, arrhythmia, valvulopathy, pulmonary hypertension, cerebrovascular events/stroke, and transient ischemic attack, peripheral arterial thromboembolism, deep venous thrombosis/pulmonary embolism, or revascularization) and deaths were recorded in specific sections of the patient eCRF. Severe exacerbation events that were considered by the investigator to be of greater intensity, frequency, or duration than expected for the patient, or events that the investigator considered may be related to the trial intervention, were also recorded as an AE/SAE. Medical incidents beginning before the start of trial intervention but after informed consent was provided were recorded as medical history/current medical conditions, not as AEs. Medical history of pneumonia in the previous 12 months was also recorded.

Female patients who became pregnant after randomization were allowed to continue in the trial at the investigator’s discretion, provided they gave signed informed consent and the investigator agreed to monitor the outcome of the pregnancy. Details of all pregnancies were collected after the start of trial intervention until the end of trial safety visit. Pregnancy complications or elective termination of a pregnancy for medical reasons were recorded as an AE (if related to the trial intervention or trial procedures) or SAE as required.

***Statistical analyses***

*Analysis sets*

Effectiveness and safety analyses included randomized patients who received ≥1 prescription of FF/UMEC/VI or ICS/LABA. Effectiveness analyses (modified full analysis set 1 [FAS-Modified-1]) were assessed according to randomized trial intervention. Safety analyses (modified safety analysis set 1 [SAF-Modified-1]) were assessed according to actual treatment prescribed. During the trial, two sites were closed by the sponsor due to non-compliance with good clinical practice. Following a trial-wide investigation, one of these sites was closed due to evidence of falsified patients, based on outliers in spirometry data and unidentifiable patients during site monitoring; these patients were excluded from the primary analysis sets (FAS-Modified-1 and SAF-Modified-1). An investigation of the second site did not reveal evidence of falsified patients; therefore, patients from this site were retained in the primary analysis sets. No other misconduct was identified during investigation. Supportive analyses excluding patients from both closed sites (FAS-Modified-2 and SAF-Modified-2) and including all patients (ie, including those from both sites; FAS and SAF) were also performed.

*Baseline definitions*

For endpoints measured at specific timepoints (eg, change from baseline [CFB] in trough FEV1 at Week 24), baseline values were defined as the last pre-dose value obtained at randomization (Visit 2), unless otherwise stated. If values at randomization were missing, the baseline value was derived from the screening visit (Visit 1). For all other endpoints, the baseline value was considered as the latest pre-dose assessment with a non-missing value, including those from unscheduled visits. If a time was not collected, Day 1 (trial intervention prescription date) assessments were assumed to be taken prior to the trial intervention prescription date and used as baseline values. Unless otherwise stated, if there was no pre-dose assessment, baseline data were considered missing.

*Primary endpoint*

The main estimand of the primary endpoint was the difference between FF/UMEC/VI versus ICS/LABA in CFB in trough FEV1 at Week 24 in patients ≥18 years of age with uncontrolled asthma, as defined by the trial’s inclusion/exclusion criteria. Descriptive statistics were provided by treatment group. Statistical testing was performed using an analysis of covariance (ANCOVA) with CFB in trough FEV1 at Week 24 as the summary measure, randomized trial treatment as a main factor, and actual pre-trial asthma maintenance therapy (untreated, ICS alone, ICS/LABA), actual pre-trial ICS dose (high, low), baseline FEV1 value, age, sex, and region (Asia [Japan, South Korea, Taiwan], North America [Canada, United States], Rest of World [Argentina, Australia]) as covariates. Actual pre-trial maintenance therapy and actual pre-trial ICS dose were based on actual stratification recorded in the eCRF if this differed from the interactive voice/web response system stratification recorded at randomization. Intercurrent events (including trial intervention discontinuation, use of prohibited medication, and ICS dose escalation) were handled using a treatment policy approach and all observed data were included in the analysis (ie, on-treatment and post-treatment data were included).

Two supplemental estimands were defined. Firstly, the intercurrent event of trial intervention discontinuation was handled using a while on-treatment strategy, to evaluate treatment effect prior to the occurrence of trial intervention discontinuation. Data were set to missing following the trial intervention discontinuation. The intercurrent event of ICS dose escalation was handled using a treatment policy strategy (ie, on-treatment and post-treatment data were included).

In the second supplemental estimand, all intercurrent events were handled using a while on-treatment strategy, except for ICS dose escalation, which was handled using a hypothetical strategy to estimate the treatment effect in the absence of ICS dose escalation (ie, had the intercurrent event not occurred). Data were set to missing following the trial intervention discontinuation and/or escalation of ICS dose.

A supportive analysis of the primary estimand was conducted using the full analysis set (FAS). The FAS included all randomized patients who received ≥1 prescription of FF/UMEC/VI or ICS/LABA (and includes patients from a site with falsified patients) and was assessed according to randomized trial intervention.

*Key secondary endpoint*

The main estimand of the key secondary endpoint was the difference between FF/UMEC/VI and ICS/LABA in patients meeting the ACQ-7 responder threshold
(≥0.5-point decrease from baseline) at Week 24. Descriptive statistics were provided by treatment group. Statistical testing was performed using a generalized linear model (logistic regression) with a logit link function at Week 24 between treatment groups, with the percent of patients meeting the responder threshold at Week 24 as the summary measure, and treatment group, sex, region, actual pre-trial asthma maintenance therapy at randomization (untreated, ICS alone, ICS/LABA), actual pre-trial ICS dose (high, low), age, and baseline value as covariates. Intercurrent events were handled as per the main estimand of the primary endpoint.

Two supplemental estimands were defined as per the primary endpoint analysis. A supportive analysis of the main estimand was conducted using the FAS.

*Other secondary endpoints and exploratory endpoints*

Patients meeting a responder threshold of CFB in trough FEV1 ≥0 mL or ≥100 mL at Week 24 was analyzed using a generalized linear model (logistic regression), with covariates of treatment group, sex, region, pre-trial asthma maintenance therapy (untreated, ICS alone, ICS/LABA), pre-trial ICS dose (high, low), age, and baseline value, using a logit link function. Results are expressed as the number and percentage of responders and non-responders, and odd ratios (OR) (95% confidence intervals [CI]) of a response with FF/UMEC/VI versus ICS/LABA.

The CFB in ACQ-5, ACQ-6, and ACQ-7 total scores at Week 24 and CFB in ACT score at Week 24 were also analyzed. Descriptive statistics were used to summarize PRO scores at baseline and Week 24. CFB in PRO endpoints at Week 24 was analyzed using an ANCOVA, with covariates of pre-trial asthma maintenance therapy (untreated, ICS alone, ICS/LABA), pre-trial ICS dose (high, low), baseline FEV1 value, age, sex, and region. Results are reported using the least squares mean (standard error) and 95% CIs.

Patients meeting a responder threshold of a ≥0.5-point improvement (decrease) from baseline in ACQ-5 and ACQ-6 at Week 24 were analyzed using a generalized linear model (logistic regression), with covariates of treatment group, sex, region, pre-trial asthma maintenance therapy (untreated, ICS alone, ICS/LABA), pre-trial ICS dose (high, low), age, and baseline value, using a logit link function. Results are expressed as the number and percentage of responders and non-responders, and OR (95% CI) of a response with FF/UMEC/VI versus ICS/LABA.

Oral corticosteroid (OCS) use (average total daily dose [mg/day]) and incidence of severe exacerbations from baseline to Week 24 were evaluated. OCS use was summarized using descriptive statistics by treatment group. The total number of severe asthma exacerbations and number of patients who experienced severe asthma exacerbations were also summarized by treatment group. A severe exacerbation was defined as a deterioration of asthma requiring the use of systemic corticosteroids (SCS; tablets, suspension, or injection) for ≥3 days or an inpatient hospitalization or emergency department visit due to asthma that required SCS. A single depo injection of SCS was considered to meet the definition of a severe exacerbation. Exacerbations separated by <7 days were treated as a continuation of the same exacerbation.

The composite endpoint evaluated responders at Week 24, defined as those who met all four components of the composite endpoint (no OCS use, no severe exacerbations, controlled asthma [ACQ-5 total score <1.50], and either optimized or stabilized lung function [CFB in trough FEV1 ≥100 mL or ≥0 mL, respectively]), and was analyzed using a generalized linear model (logistic regression), with covariates of treatment group, sex, region, actual pre-trial asthma maintenance therapy (untreated, ICS alone, ICS/LABA), pre-trial ICS dose (high, low), age, and baseline value, using a logit link function. Descriptive statistics were used to summarize responders by treatment group. Baseline values were recorded as previously described.

For the other secondary endpoints and exploratory endpoints, estimands for continuous endpoints followed the same approach as the main estimand of the primary endpoint and estimands for binary endpoints followed the main estimand of the key secondary endpoint; estimands used the same strategies for intercurrent events. The only difference was that the endpoint attribute aligned with the endpoint of interest.

*Missing data*

Data collected on- or post-trial intervention discontinuation were included in the primary effectiveness analysis, with no imputation of missing data.

For responder analyses, patients with a missing baseline data were considered as having a missing responder status. Those with missing data at the timepoint of interest were considered non-responders; patients who withdrew from the trial prior to the timepoint of interest were considered non-responders at that timepoint. Missing ACQ items were imputed if only one item was missing: for example, if a patient did not complete 1 of the 5 questions of the ACQ-5 during a trial visit, then the ACQ-5 score was calculated as the mean of the responses to the remaining 4 questions at that visit. If ≥2 items were missing, the ACQ score was defined as missing.

***Ethics approval***

Trial documents and protocol amendments received approval by relevant local Institutional Review Boards (IRB) and/or Independent Ethics Committees (ECs). Approval in Argentina was provided by the Comité de Ética Dr. Claude Bernard (reference numbers: GSK219912.20240610.13.PI; GSK219912.20240527.02.PI); Comité Institucional de Ética de Investigación en Salud Prof. Dr. Marcelino Rusculleda (219912); Comité de Ética en Investigación Hospital Alta Complejidad en Red El Cruce NCK, Comité de Ética de CER Investigaciones Clínicas, Investigaciones en Alergia y Enfermedades Respiratorias (INAER) – Comité de Ética en Investigación, Comité de Ética en Investigación Instituto Ave Pulmo – Fundación Enfisema, Comité de Bioética – CIMEL, Comité de Ética en Investigación FUMELIT, Comité de Ética del Centro de Osteopatías Médicas, Comité de Ética en Investigación de CEMER, and Comité Independiente de Ética para Ensayos en Farmacología Clínica - Fundación de Estudios Farmacológicos y de Medicamentos “Prof. Luis M. Zieher” (no reference numbers available). Approval in Australia was provided by the Bellberry Human Research EC (2024-01-106). Approval in Canada and the United States was provided by Advarra IRB (Pro00077371). Approval in Japan was provided by the Medical Corporation Shintokai Yokohama Minoru Clinic IRB, Yamauchi Clinic IRB, Suzuki Internal & Circulatory Medical Clinic IRB, Japan Conference of Clinical Research IRB, Japan Organization of Occupational Health and Safety Kobe Rosai Hospital IRB, Yoyogi Mental Clinic IRB, Review Board of Human Rights and Ethics for Clinical Studies IRB, and Kondo Memorial Medical Foundation Tomisaka Clinic IRB (no reference numbers available); Teikyo University Hospital IRB (R24-454); Kumamoto University Hospital IRB (2024011); Showa Medical University Hospital IRB (2411004); Aso Iizuka Hospital IRB (45383); and Hospital of the University of Occupational and Environmental Health, Japan IRB (10556). Approval in South Korea was provided by the Kosin University Gospel Hospital IRB (2024-06-009); Hanyang University Seoul Hospital IRB (2024-03-024); Seoul National University Bundang Hospital IRB (B-2409-925-402); Seoul National University Hospital IRB (H-2404-114-1532); Korea University Anam Hospital IRB (no reference number available); Ewha Womans University Seoul Hospital IRB (2024-03-031); Kyungpook National University Chilgok Hospital IRB (219912/2024-04-044-004); SMG-SNU Boramae Medical Center IRB (30-2024-57); Ajou University Hospital HRPC (Human Research Protection Center) (AJOUIRB-CT-2024-450); and Konkuk University Medical Center IRB (KUMC2024-04-045). Approval in Taiwan was provided by the China Medical University Hospital Research EC (CMUH113-REC3-089); National Taiwan University Hospital Research EC (202405036MSC); IRB of Taichung Veterans General Hospital (SC24270B); and Kaohsiung Medical University Chung-Ho Memorial Hospital IRB (KMUHIRB-F(I)-20240115). All patients provided written, informed consent.

**Supplementary tables and figures**

### **Supplementary Table 1.** Eligibility criteria at screening and randomization

| **Inclusion criteria** |
| --- |
| Male or female patients 18–75 years of age at the time of signing informed consent |
| Capable of providing signed informed consent |
| Diagnosis of asthma according to GINA 2023 recommendations prior to or at the screening visit7 |
| Currently untreated, defined as no exposure to ICS-containing therapy within the  3 months prior to randomization  Or  Treated with daily maintenance ICS or ICS/LABA for ≥3 months prior to randomization with no changes to maintenance asthma medications during the 3 months immediately prior to randomization |
| Uncontrolled asthma, defined as ACQ-6 score ≥1.5 at randomization |
| Able to complete the trial questionnaires |
| Able to perform technically acceptable and repeatable FEV1 maneuvers (ie, a minimum of 2 acceptable and 1 repeatable effort) at randomization |
| **Exclusion criteria** |
| Recent history of life-threatening asthma, defined as an asthma episode that required intubation and/or associated with hypercapnia, respiratory arrest, or hypoxic seizures within the last 5 years |
| History of >1 severe exacerbation of asthma within the 12 months prior to randomization. A severe exacerbation was defined as a deterioration of asthma requiring the use of SCS (tablets, suspension, or injection) for ≥3 days or an inpatient hospitalization or ED visit due to asthma that required SCS. A single depo injection of SCS was considered to meet the definition of a severe exacerbation |
| Female patients of childbearing potential not following ≥1 highly effective method of contraception for the duration of the trial, including those who were pregnant or lactating or were planning on become pregnant during the trial. The investigator was responsible for evaluating the effectiveness of the contraceptive method in relationship to the first dose of trial intervention. Female patients of childbearing potential must have had a negative highly sensitive urine pregnancy test (or serum if required by local regulations) ≤7 days prior to randomization |
| Exposure to inhaled triple therapy (ICS+LAMA+LABA as SITT or MITT) and/or any LAMA-containing therapy within 12 months prior to randomization |
| Ongoing need for biologic therapy or recent use of a biologic therapy within 12 months of randomization or within 5 half-lives of the prior investigational trial (whichever was the longer duration) |
| Diagnosis of COPD, as per GOLD 2024 recommendations8 |
| Historical or current evidence of uncontrolled or clinically significant disease; significant disease was defined as any disease that, in the opinion of the investigator, would put the safety of the patient at risk through participation, or which would affect the effectiveness or safety analysis if the disease/condition exacerbated during the trial |
| Current treatment with FF/VI ELLIPTA and FF ELLIPTA |
| Medically unable to withhold albuterol/salbutamol for 6 hours prior to spirometry testing at randomization and the morning of each trial visit with spirometry thereafter |
| Medically unable to withhold morning maintenance ICS/LABA and/or ICS/LAMA/LABA for 24 hours prior to spirometry testing at randomization and the morning of each trial visit with spirometry thereafter |
| Changes in asthma medication within 3 months prior to randomization |
| SCS use for reasons other than the treatment of an asthma exacerbation |
| History of hypersensitivity to any of the trial medications (eg, corticosteroid, anticholinergic/muscarinic receptor antagonist, β2-agonist) or components of the inhalation powder (eg, lactose, magnesium stearate). Patients that had lactose intolerance were not excluded. Patients with rare hereditary problems of galactose intolerance, total lactase deficiency or glucose-galactose malabsorption were excluded |
| Use of any investigational drug treatment within 3 months prior to randomization or within 5 half-lives of the prior investigational trial (whichever was the longer duration) |
| Unable to read and/or complete trial-related materials |

ACQ-6, Asthma Control Questionnaire-6; COPD, chronic obstructive pulmonary disease; ED, emergency department; FEV1, forced expiratory volume in 1 second; FF, fluticasone furoate; GINA, Global Initiative for Asthma; GOLD, Global Initiative for Chronic Obstructive Lung Disease; ICS, inhaled corticosteroid; LABA, long-acting β2-agonist; LAMA, long-acting muscarinic antagonist; MITT, multiple-inhaler triple therapy; SCS, systemic corticosteroid; SITT, single-inhaler triple therapy; VI, vilanterol.

### **Supplementary Table 2.** Effectiveness endpoints

| **Effectiveness endpoints** |
| --- |
| **Primary** |
| Change from baseline in trough FEV1 at Week 24 |
| **Key secondary** |
| ACQ-7 response at Week 24, defined as a ≥0.5-point improvement (decrease) from baseline in ACQ-7 score at Week 24 |
| **Other secondary** |
| **Lung function** |
| Change from baseline in trough FEV1 ≥100 mL at Week 24 |
| Change from baseline in trough FEV1 ≥0 mL at Week 24 |
| **Asthma control** |
| ACQ-6 response at Week 24, defined as a ≥0.5-point improvement (decrease) from baseline in ACQ-6 score at Week 24 |
| ACQ-5 response at Week 24, defined as a ≥0.5-point improvement (decrease) from baseline in ACQ-5 score at Week 24 |
| Change from baseline in ACQ-7 total score Week 24 |
| Change from baseline in ACQ-6 total score Week 24 |
| Change from baseline in ACQ-5 total score Week 24 |
| Change from baseline in ACT score at Week 24 |
| **Quality of lifea** |
| Change from baseline in the AQLQ12+ total and domain scores at Week 24 |
| Change from baseline in all four domains of the WPAI:Asthma at Week 24 |
| **Exploratory** |
| OCS use at Week 24 |
| Incidence of severe exacerbations at Week 24 |
| **Composite endpoint** |
| Patients achieving a composite endpoint at Week 24, comprising the following components: no OCS use at Week 24 since baseline; no severe asthma exacerbations at Week 24 since baseline; ACQ-5 total score <1.5 at Week 24 (controlled asthma); change from baseline in trough FEV1 ≥100 mL at Week 24 (lung function optimization);; |
| Patients achieving a composite endpoint at Week 24, comprising the following components: no OCS use at Week 24 since baseline; no severe asthma exacerbations at Week 24 since baseline; ACQ-5 total score <1.5 at Week 24 (controlled asthma); change from baseline in trough FEV1 ≥0 mL at Week 24 (lung function stabilization) |

aNot reported. Future analyses will include endpoints requiring additional follow-up to Week 52 and other secondary endpoints.

ACQ-5/-6/-7, Asthma Control Questionnaire-5/-6/-7; ACT, Asthma Control Test; AQLQ12+, Asthma Quality of Life Questionnaire for 12 years and older; FEV1, forced expiratory volume in 1 second; OCS, oral corticosteroid; WPAI:Asthma, asthma-specific Work Productivity and Activity Impairment Questionnaire.

### **Supplementary Table 3.** Summary of Week 24 trial population

|  | **FF/UMEC/VI** | **ICS/LABA** | **Overall population** |
| --- | --- | --- | --- |
| Screened, n | – | – | 1590 |
| Enrolled, n | 682 | 676 | 1358 |
| Randomized, n | 682 | 676 | 1358 |
| FAS-Modified-1, na | 619 | 617 | 1236 |
| FAS-Modified-2, nb | 604 | 600 | 1204 |
| FAS, nc | 678 | 671 | 1349 |
| SAF-Modified-1, nd | 631 | 605 | 1236 |
| SAF-Modified-2, ne | 604 | 600 | 1204 |
| SAF, nf | 690 | 659 | 1349 |

aAll randomized patients who received ≥1 prescription of FF/UMEC/VI or ICS/LABA, excluding a site with evidence of falsified patients, assessed according to randomized trial intervention (primary effectiveness analysis); ball randomized patients who received ≥1 prescription of FF/UMEC/VI or ICS/LABA, excluding one site with evidence of falsified patients and one site with GCP non-compliance, assessed according to randomized trial intervention (supportive effectiveness analysis); call randomized patients who received ≥1 prescription of FF/UMEC/VI or ICS/LABA, assessed according to randomized trial intervention (supportive effectiveness analysis); dall randomized patients who received ≥1 prescription of FF/UMEC/VI or ICS/LABA, excluding a site with evidence of falsified patients, assessed according to actual trial intervention prescribed (primary safety analysis); eall randomized patients who received ≥1 prescription of FF/UMEC/VI or ICS/LABA, excluding one site with evidence of falsified patients and one site with GCP non-compliance, assessed according to actual trial intervention prescribed (supportive safety analysis); fall randomized patients who received ≥1 prescription of FF/UMEC/VI or ICS/LABA, assessed according to actual trial intervention prescribed (supportive safety analysis).

FAS, full analysis set; FAS-Modified-1, modified full analysis set 1; FAS-Modified-2, modified full analysis set 2; FF, fluticasone furoate; GCP, good clinical practice; ICS, inhaled corticosteroid; LABA, long-acting β2-agonist; SAF, safety analysis set; SAF-Modified-1, modified safety analysis set 1; SAF-Modified-2, modified safety analysis set 2; UMEC, umeclidinium; VI, vilanterol.

### **Supplementary Table 4.** Summary of extent of exposure of trial intervention (SAF-Modified-1)

|  | **FF/UMEC/VI**  **(N=631)** | **ICS/LABA**  **(N=605)** | **Overall population**  **(N=1236)** |
| --- | --- | --- | --- |
| **Trial medications,a n (%)** | | | |
| Beclometasone + formoterol | 0 | 9 (1.5) | 9 (0.7) |
| Budesonide + formoterol | 0 | 265 (43.8) | 265 (21.4) |
| Fluticasone furoate + umeclidinium + vilanterol | 631 (100) | 1 (0.2) | 632 (51.1) |
| Fluticasone furoate + vilanterol | 0 | 16 (2.6) | 16 (1.3) |
| Fluticasone propionate + formoterol | 0 | 114 (18.8) | 114 (9.2) |
| Fluticasone propionate + salmeterol | 0 | 198 (32.7) | 198 (16.0) |
| Formoterol + mometasone | 0 | 11 (1.8) | 11 (0.9) |
| Indacaterol + mometasone | 0 | 14 (2.3) | 14 (1.1) |
| **Tria**l **medication dose modified, n (%)** | | | |
| Yes | 22 (3.5) | 36 (6.0) | 58 (4.7) |
| Dose increased | 11 (50.0) | 18 (50.0) | 29 (50.0) |
| Dose reduced | 11 (50.0) | 18 (50.0) | 29 (50.0) |

aData for the same medication collected under different names in the eCRF are combined; the generic name is included.

The SAF-Modified-1 was assessed based on actual trial intervention prescribed and excluded one site closed due to evidence of
falsified patients.

eCRF, electronic case report form; FF, fluticasone furoate; ICS, inhaled corticosteroid; LABA, long-acting β2-agonist; SAF-Modified-1, modified safety analysis set 1; UMEC, umeclidinium; VI, vilanterol.

### **Supplementary Table 5.** Concomitant respiratory asthma medications (FAS-Modified-1)

| **Concomitant medications, n (%)** | **FF/UMEC/VI (N=619)** | **ICS/LABA (N=617)** |
| --- | --- | --- |
| Montelukasta | 180 (29.1) | 142 (23.0) |
| Budesonide | 97 (15.7) | 83 (13.5) |
| Fluticasone propionate | 87 (14.1) | 66 (10.7) |
| Formoterol fumarate | 68 (11.0) | 63 (10.2) |
| Salmeterol xinafoate | 62 (10.0) | 51 (8.3) |
| Theophylline | 32 (5.2) | 35 (5.7) |

aIncludes data recorded for montelukast and montelukast sodium.

Medications with ≥5% of patients are reported. Concomitant medications are those ongoing at the start of trial intervention or started on or after the prescription date of trial intervention.

FAS-Modified-1, modified full analysis set 1; FF, fluticasone furoate; ICS, inhaled corticosteroid; LABA, long-acting β2-agonist; UMEC, umeclidinium; VI, vilanterol.

### **Supplementary Table 6.** Medical history (FAS-Modified-1)

| **Comorbidities, n (%)** | **FF/UMEC/VI (N=619)** | **ICS/LABA (N=617)** | **Overall population (N=1236)** |
| --- | --- | --- | --- |
| Any comorbidity | 530 (85.6) | 548 (88.8) | 1078 (87.2) |
| Respiratory, thoracic and mediastinal disorders | 260 (42.0) | 284 (46.0) | 544 (44.0) |
| Rhinitis allergic | 168 (27.1) | 186 (30.1) | 354 (28.6) |
| Asthmaa | 90 (14.5) | 96 (15.6) | 186 (15.0) |
| Metabolism and nutrition disorders | 180 (29.1) | 192 (31.1) | 372 (30.1) |
| Type 2 diabetes mellitus | 52 (8.4) | 57 (9.2) | 109 (8.8) |
| Obesity | 45 (7.3) | 52 (8.4) | 97 (7.8) |
| Hypercholesterolemia | 42 (6.8) | 37 (6.0) | 79 (6.4) |
| Hyperlipidemia | 34 (5.5) | 43 (7.0) | 77 (6.2) |
| Dyslipidemia | 34 (5.5) | 36 (5.8) | 70 (5.7) |
| Vascular disorders | 178 (28.8) | 186 (30.1) | 364 (29.4) |
| Hypertension | 172 (27.8) | 174 (28.2) | 346 (28.0) |
| Musculoskeletal and connective tissue disorders | 136 (22.0) | 138 (22.4) | 274 (22.2) |
| Osteoarthritis | 35 (5.7) | 38 (6.2) | 73 (5.9) |
| Back pain | 23 (3.7) | 35 (5.7) | 58 (4.7) |
| Psychiatric disorders | 140 (22.6) | 133 (21.6) | 273 (22.1) |
| Depression | 64 (10.3) | 62 (10.0) | 126 (10.2) |
| Anxiety | 61 (9.9) | 53 (8.6) | 114 (9.2) |
| Insomnia | 26 (4.2) | 37 (6.0) | 63 (5.1) |
| Gastrointestinal disorders | 122 (19.7) | 138 (22.4) | 260 (21.0) |
| Gastroesophageal reflux disease | 73 (11.8) | 81 (13.1) | 154 (12.5) |
| Infections and infestations | 115 (18.6) | 110 (17.8) | 225 (18.2) |
| Immune system disorders | 92 (14.9) | 104 (16.9) | 196 (15.9) |
| Seasonal allergy | 45 (7.3) | 45 (7.3) | 90 (7.3) |
| Surgical and medical procedures | 96 (15.5) | 94 (15.2) | 190 (15.4) |
| Nervous system disorders | 77 (12.4) | 77 (12.5) | 154 (12.5) |
| Endocrine disorders | 68 (11.0) | 66 (10.7) | 134 (10.8) |
| Hypothyroidism | 53 (8.6) | 49 (7.9) | 102 (8.3) |
| Skin and subcutaneous tissue disorders | 51 (8.2) | 76 (12.3) | 127 (10.3) |
| Eye disorders | 40 (6.5) | 58 (9.4) | 98 (7.9) |
| Neoplasms benign, malignant, and unspecified (including cysts and polyps) | 43 (6.9) | 46 (7.5) | 89 (7.2) |
| Reproductive system and breast disorders | 40 (6.5) | 41 (6.6) | 81 (6.6) |
| Social circumstances (included menopause, post menopause, and organ donor) | 43 (6.9) | 35 (5.7) | 78 (6.3) |
| Cardiac disorders | 27 (4.4) | 33 (5.3) | 60 (4.9) |
| Injury, poisoning and procedural complications | 25 (4.0) | 32 (5.2) | 57 (4.6) |

aAll patients had a diagnosis of asthma (defined by Global Initiative for Asthma 2023 recommendations) prior to randomization.

Comorbidities in ≥5% of patients are reported.

FAS-Modified-1, modified full analysis set 1; FF, fluticasone furoate; ICS, inhaled corticosteroid; LABA, long-acting β2-agonist; UMEC, umeclidinium; VI, vilanterol.

### **Supplementary Table 7.** Supportive analyses of intercurrent events for CFB in trough FEV1 at Week 24 (FAS-Modified-1)

|  | **FF/UMEC/VI (N=619)** | **ICS/LABA (N=617)** |
| --- | --- | --- |
| **While on-treatment strategy for trial intervention discontinuationa** | *n=546* | *n=543* |
| Baseline trough FEV1, mL |  |  |
| Mean (SD) | 2454 (792) | 2509 (775) |
| Week 24 trough FEV1, mL |  |  |
| Mean (SD) | 2591 (793) | 2565 (792) |
| CFB in trough FEV1 at Week 24, mL |  |  |
| LS mean (95% CI) CFB | 180 (140, 221) | 112 (73, 152) |
| LS mean treatment difference (95% CI), *P* valueb | 68 (36, 100); <0.001 | REF |
| **While on-treatment strategy for trial intervention discontinuation; hypothetical strategy for post-ICS dose escalationc** | *n=537* | *n=529* |
| Baseline trough FEV1, mL |  |  |
| Mean (SD) | 2449 (791) | 2510 (777) |
| Week 24 trough FEV1, mL |  |  |
| Mean (SD) | 2586 (792) | 2566 (794) |
| CFB in trough FEV1 at Week 24, mL |  |  |
| LS mean (95% CI) CFB | 187 (145, 228) | 120 (79, 161) |
| LS mean treatment difference (95% CI), *P* valueb | 66 (34, 99); <0.001 | REF |

aThe intercurrent event of trial intervention discontinuation was handled using a while on-treatment strategy, to evaluate treatment effect prior to the occurrence of trial intervention discontinuation. Data were set to missing following the trial intervention discontinuation. The intercurrent event of ICS dose escalation was handled using a treatment policy strategy (ie, on-treatment and post-treatment data were included); bendpoint not included in the statistical hierarchy; the *P* value was not adjusted for multiplicity and is considered descriptive; cintercurrent events were handled using a while on-treatment strategy, except for ICS dose escalation, which was handled using a hypothetical strategy to estimate the treatment effect in the absence of ICS dose escalation (ie, had the intercurrent event not occurred). Data were set to missing following the trial intervention discontinuation and/or escalation of ICS dose.

CFB, change from baseline; CI, confidence interval; FAS-Modified-1, modified full analysis set 1; FEV1, forced expiratory volume in 1 second; FF, fluticasone furoate; ICS, inhaled corticosteroid; LABA, long-acting β2-agonist; LS, least squares; SD, standard deviation; UMEC, umeclidinium; VI, vilanterol.

### **Supplementary Table 8.** Supportive analyses of CFB in trough FEV1 at Week 24 (FAS-Modified-2a and FASb)

|  | **FF/UMEC/VI** | **ICS/LABA** |
| --- | --- | --- |
| FAS-Modified-2 | *n=560/604* | *n=544/600* |
| Baseline trough FEV1, mL |  |  |
| Mean (SD) | 2453 (791) | 2509 (774) |
| Week 24 trough FEV1, mL |  |  |
| Mean (SD) | 2590 (794) | 2566 (790) |
| CFB in trough FEV1 at Week 24, mL |  |  |
| LS mean (95% CI) CFB | 179 (140, 218) | 111 (73, 150) |
| LS mean treatment difference (95% CI), *P* valuec | 67 (36, 99); <0.001 | REF |
| FAS | *n=621/678* | *n=600/671* |
| Baseline trough FEV1, mL |  |  |
| Mean (SD) | 2463 (766) | 2532 (788) |
| Week 24 trough FEV1, mL |  |  |
| Mean (SD) | 2572 (759) | 2548 (758) |
| CFB in trough FEV1 at Week 24, mL |  |  |
| LS mean (95% CI) CFB | 184 (139, 230) | 109 (63, 155) |
| LS mean treatment difference (95% CI), *P* valuec | 75 (38, 112); <0.001 | REF |

aThe FAS-Modified-2 included all randomized patients who received ≥1 prescription of FF/UMEC/VI or ICS/LABA, excluding one site with evidence of falsified patients and one site with GCP non-compliance, assessed according to randomized trial intervention; bthe FAS included all randomized patients who received ≥1 prescription of FF/UMEC/VI or ICS/LABA, assessed according to randomized trial intervention; cendpoint not included in the statistical hierarchy; the *P* value was not adjusted for multiplicity and is considered descriptive.

CFB, change from baseline; CI, confidence interval; FAS, full analysis set; FAS-Modified-2, modified full analysis set 2; FEV1, forced expiratory volume in 1 second; FF, fluticasone furoate; GCP, good clinical practice; ICS, inhaled corticosteroid; LABA, long-acting β2-agonist; LS, least squares; SD, standard deviation; UMEC, umeclidinium; VI, vilanterol.

### **Supplementary Table 9.** Supportive analyses of intercurrent events for a response in ACQ-7 total score at Week 24a (FAS-Modified-1)

|  | **FF/UMEC/VI (N=619)** | **ICS/LABA (N=617)** |
| --- | --- | --- |
| **While on-treatment strategy for trial intervention discontinuationb** | *n=542* | *n=542* |
| ACQ-7 response at Week 24a |  |  |
| Responders, n (%) | 476 (87.8) | 440 (81.2) |
| Non-responders, n (%) | 66 (12.2) | 102 (18.8) |
| OR (95% CI), *P* valuec | 1.69 (1.20, 2.38); 0.003 | REF |
| **While on-treatment strategy for trial intervention discontinuation; hypothetical strategy for post-ICS dose escalationd** | *n=533* | *n=528* |
| ACQ-7 response at Week 24a |  |  |
| Responders, n (%) | 470 (88.2) | 428 (81.1) |
| Non-responders, n (%) | 63 (11.8) | 100 (18.9) |
| OR (95% CI), *P* valuec | 1.75 (1.23, 2.47); 0.002 | REF |

aA response was defined as a ≥0.5-point improvement (decrease) from baseline to Week 24; bthe intercurrent event of trial intervention discontinuation was handled using a while on treatment strategy, to evaluate treatment effect prior to the occurrence of trial intervention discontinuation. ACQ-7 response was set to missing following the trial intervention discontinuation. The intercurrent event of ICS dose escalation was handled using a treatment policy strategy (ie, on-treatment and post treatment data were included); cendpoint not included in the statistical hierarchy; the *P* value was not adjusted for multiplicity and is considered descriptive; dintercurrent events were handled using a while on treatment strategy, except for ICS dose escalation, which was handled using a hypothetical strategy to estimate the treatment effect in the absence of ICS dose escalation (ie, had the intercurrent event not occurred). Data were set to missing following the trial intervention discontinuation and/or escalation of ICS dose.

ACQ-7, Asthma Control Questionnaire-7; CI, confidence interval; FAS-Modified-1, modified full analysis set 1; FF, fluticasone furoate; ICS, inhaled corticosteroid; LABA, long-acting β2-agonist; LS, least squares; OR, odds ratio; SD, standard deviation; UMEC, umeclidinium; VI, vilanterol.

### **Supplementary Table 10.** Supportive analysis of a response in ACQ-7 total scorea at Week 24 (FAS-Modified-2b and FASc)

|  | **FF/UMEC/VI** | **ICS/LABA** |
| --- | --- | --- |
| FAS-Modified-2 | N=604 | N=600 |
| ACQ-7 response at Week 24a |  |  |
| Responders, n (%) | 487 (80.6) | 441 (73.5) |
| Non-responders, n (%) | 117 (19.4) | 159 (26.5) |
| Non-responder due to missing data, n (%)d | 48 (41.0) | 57 (35.8) |
| OR (95% CI), *P* valuee | 1.49 (1.13, 1.97); 0.005 | REF |
| FAS | N=678 | N=671 |
| ACQ-7 response at Week 24a |  |  |
| Responders, n (%) | 510 (75.2) | 465 (69.3) |
| Non-responders, n (%) | 168 (24.8) | 206 (30.7) |
| Non-responder due to missing data, n (%)d | 61 (36.3) | 75 (36.4) |
| OR (95% CI), *P* valuee | 1.35 (1.06, 1.73); 0.017 | REF |

aA response was defined as a ≥0.5-point improvement (decrease) from baseline to Week 24; bthe FAS-Modified-2 included all randomized patients who received ≥1 prescription of FF/UMEC/VI or ICS/LABA, excluding one site with evidence of falsified patients and one site with GCP non-compliance, assessed according to randomized trial intervention; cthe FAS included all randomized patients who received ≥1 prescription of FF/UMEC/VI or ICS/LABA, assessed according to randomized trial intervention; dpercentages based on the number of non-responders; eendpoint not included in the statistical hierarchy; the *P* value was not adjusted for multiplicity and is considered descriptive.

ACQ-7, Asthma Control Questionnaire-7; CI, confidence interval; FAS, full analysis set; FAS-Modified-2, modified full analysis set 2; FF, fluticasone furoate; GCP, good clinical practice; ICS, inhaled corticosteroid; LABA, long-acting β2-agonist; OR, odds ratio; UMEC, umeclidinium; VI, vilanterol.

### **
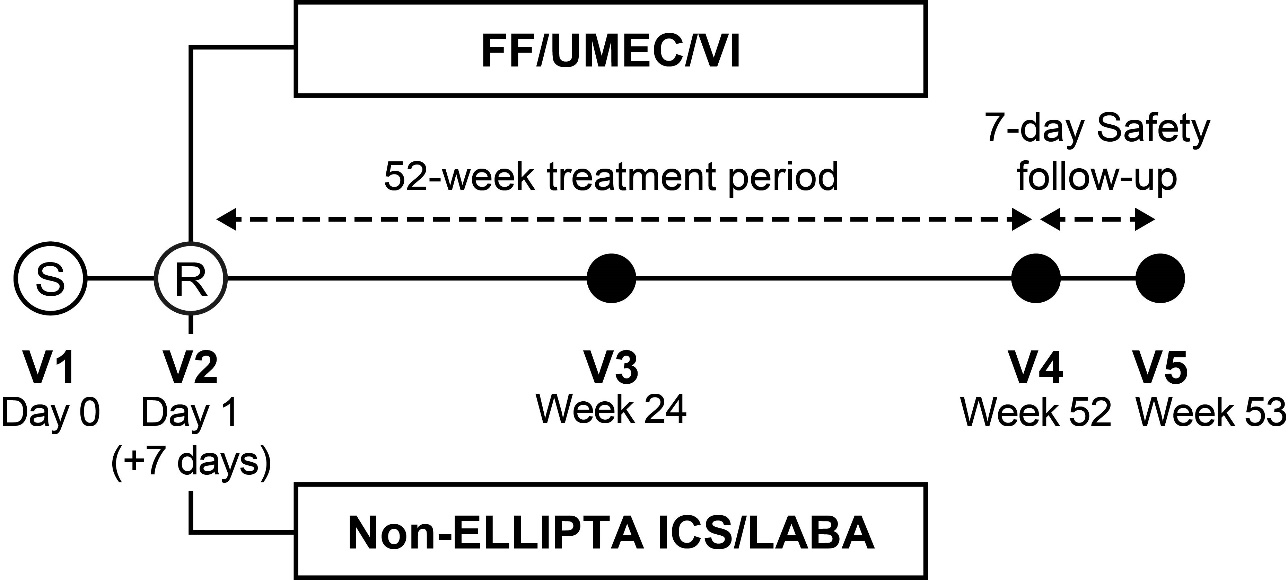
Supplementary Figure 1.** PERFORM trial design

V5 will be a telephone visit.

FF, fluticasone furoate; ICS, inhaled corticosteroid; LABA, long-acting β2-agonist; R, randomization; S, screening; UMEC, umeclidinium; V, visit; VI, vilanterol.

**References**

1. Graham BL, Steenbruggen I, Miller MR, et al. Standardization of Spirometry 2019 Update. An Official American Thoracic Society and European Respiratory Society Technical Statement. *Am J Respir Crit Care Med*. 2019;200(8):e70–e88.

2. Juniper EF, O'Byrne PM, Guyatt GH, Ferrie PJ, King DR. Development and validation of a questionnaire to measure asthma control. *Eur Respir J*. 1999;14(4):902–7.

3. Juniper EF, Bousquet J, Abetz L, Bateman ED, Committee G. Identifying 'well-controlled' and 'not well-controlled' asthma using the Asthma Control Questionnaire. *Respir Med*. 2006;100(4):616–21.

4. Juniper EF, Svensson K, Mork AC, Stahl E. Measurement properties and interpretation of three shortened versions of the asthma control questionnaire. *Respir Med*. 2005;99(5):553–8.

5. Nathan RA, Sorkness CA, Kosinski M, et al. Development of the asthma control test: a survey for assessing asthma control. *J Allergy Clin Immunol*. 2004;113(1):59–65.

6. Schatz M, Sorkness CA, Li JT, et al. Asthma Control Test: reliability, validity, and responsiveness in patients not previously followed by asthma specialists. *J Allergy Clin Immunol*. 2006;117(3):549–56.

7. Global Initiative for Asthma. 2023 Global strategy for asthma management and prevention. Available from: https://ginasthma.org/wp-content/uploads/2023/07/GINA-2023-Full-report-23_07_06-WMS.pdf. Accessed May 2025.

8. Global Initiative for Chronic Obstructive Lung Disease. Global Strategy for Prevention, Diagnosis and Management of COPD: 2024 Report. 2024. Available from: https://goldcopd.org/2024-gold-report/. Accessed 22 July 2025.
